# Supplementary material for: Synergistic chemo-photothermal therapy and osteogenic activity using graphene oxide-functionalized composite whitlockite bone particles
Source: Royal Society of Chemistry journal article supplement (doi:10.1039/d5tb00240k), 2025-01-01

**Supporting Information**

**Synergistic Chemo-Photothermal Therapy and Osteogenic Activity Using Graphene Oxide-Functionalized Composite Whitlockite Bone Particles**

Abdelrahman I. Rezka,b,c, Jung-Mi Oha, Abdalla Abdal-hayd, Jun Leee, Sungkun Chuna*, Beom-Su Kimf*

a Department of Physiology, Institute for Medical Sciences, Jeonbuk National University Medical School, Jeonju-si 54907, Korea

b Department of Bionanotechnology and Bioconvergence Engineering, Graduate School, Jeonbuk National University, Jeonju, Republic of Korea,

c Division of Mechanical Design Engineering, Jeonbuk National University, Jeonju, Jeonbuk 561-756, Republic of Korea.

d School of Dentistry, University of Queensland, 288 Herston Road, Herston, QLD 4006, Australia

e Departments of Oral and Maxillofacial Surgery, Wonkwang University, Iksan, Jeonbuk, 54538, South Korea

f Department of R&BD, Cellco Inc., 208, Venture Startup Center, Jeonju University, 303, Cheonjam-ro, Wansan-gu, Jeonju-si 55069, Korea

*** Corresponding authors:**

Sungkun Chun, e-mail: [sungkun.chun@jbnu.ac.kr](mailto:sungkun.chun@jbnu.ac.kr), Tel: +82-63-270-4290, Fax: +82-63-270-3078, & Beom-Su Kim, e-mail: [bskim@jbnu.ac.kr](mailto:bskim@jbnu.ac.kr), Tel: +82-63-226-2235, Fax: +82-63-226-2236.


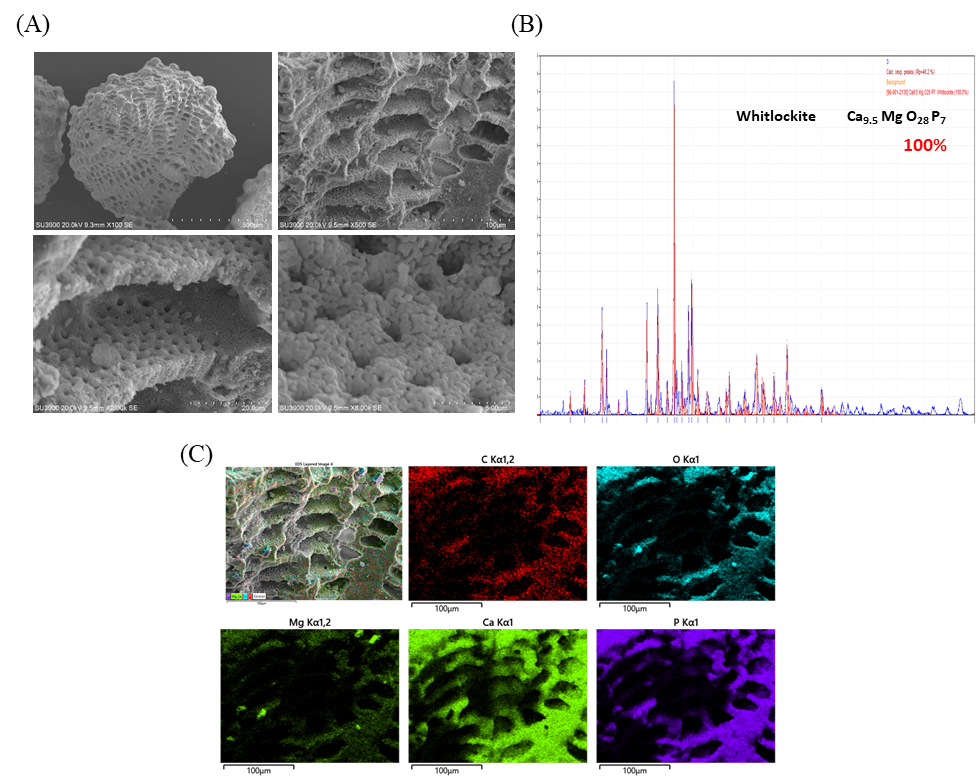


**Figure S1.** Figure S1: SEM, XRD, and EDS mapping of WH granules.


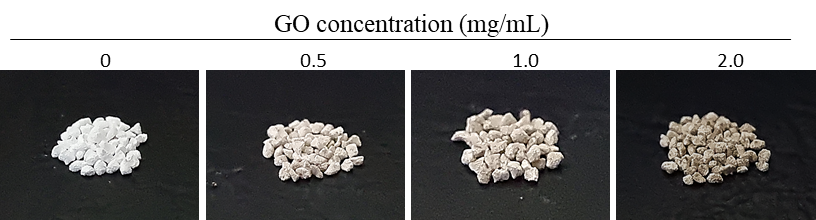


Figure S2: digital images for microparticles after coating with different concentration of GO.


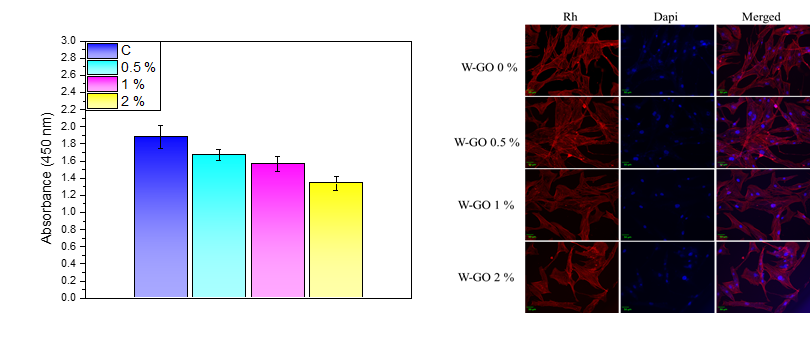


Figure S3: In vitro biocompatibility study of WG microparticles on MC3T3E1using CCK-8 assay, and Confocal Laser Scanning imaging using phalloidin rhodamine to visualize the cytoskeleton (F-actin) and DAPI to counterstain the nucleus.

Figure S4: Figure showing the zeta potential of WG before and after DOX loading.


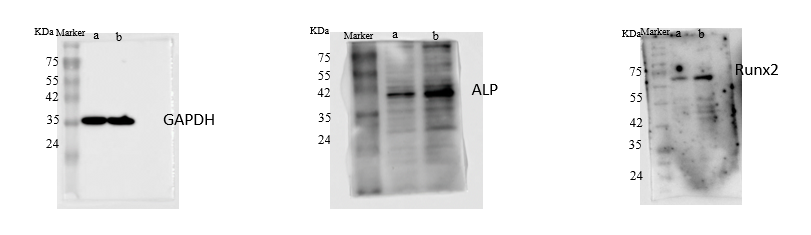


Figure S5: Western blot analysis and relative protein intensity for RUNX2, ALP to the GAPDH protein after 7 days.

Table S.1 showing ICP-OES analysis of WH granule


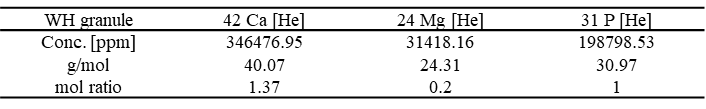

Supplement: d5tb00240k1.zip [file d5tb00240k1.zip]
